# Supplementary material
Source: publisher site journal article supplement (https://www.dovepress.com/get_supplementary_file.php?f=477268.docx)
Supplement: Supplementary file 1 [file get_supplementary_file.php]

1


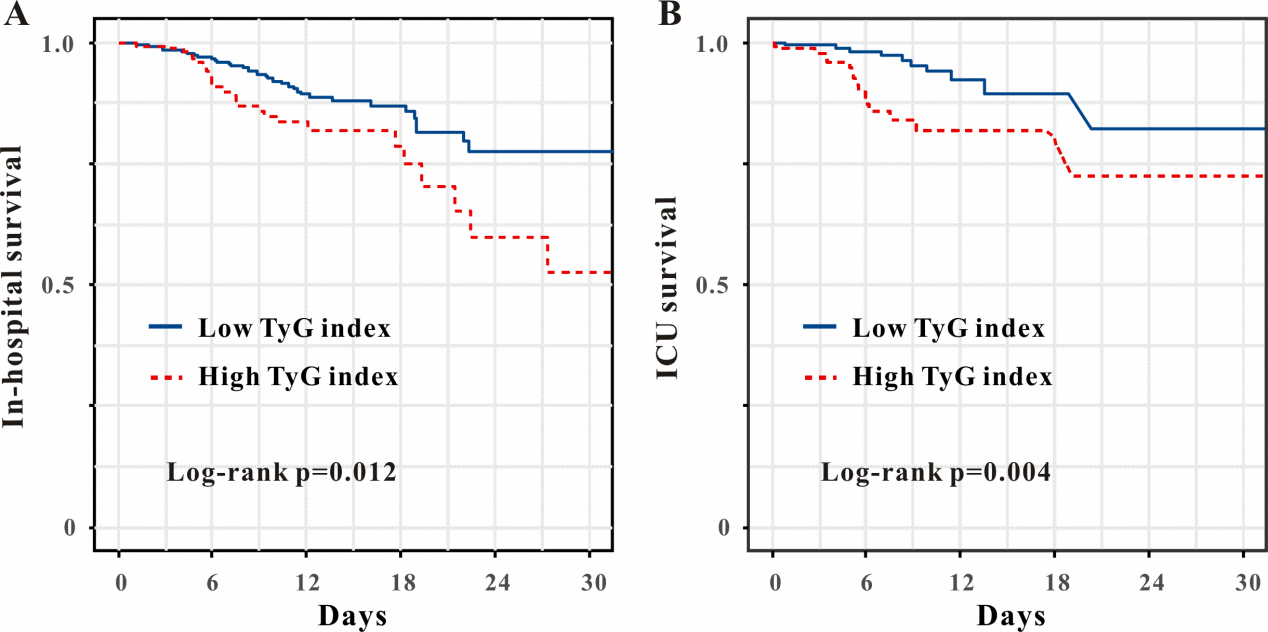


**Supplemental Figure 1** Kaplan-Meier survival analysis curves of the high-TyG index and low-TyG index for in-hospital mortality (**A**), and ICU mortality (**B**). TyG index, triglyceride-glucose index, ICU, intensive care unit.
